# Supplementary material for: Induction of Glutathione Synthesis Provides Cardioprotection Regulating NO, AMPK and PPARa Signaling in Ischemic Rat Hearts
Source: MDPI journal article supplement (doi:10.3390/life11070631), 2021-06-29
Supplement: s1 [file s1]

## Article

# Induction of Glutathione Synthesis Provides Cardioprotection Regulating NO, AMPK and PPAR $\alpha$ Signaling in Ischemic Rat Hearts

Yulia V. Goshovska <sup>1,\*</sup>, Raisa A. Fedichkina <sup>1</sup>, Volodymyr V. Balatskyi <sup>2</sup>, Oksana O. Piven <sup>3</sup>, Pawel Dobrzyn <sup>2</sup> and Vadym F. Sagach <sup>1</sup>

<sup>1</sup> Department of Blood Circulation, Bogomoletz Institute of Physiology, National Academy of Sciences of Ukraine, 4 Bogomolets Str., Kyiv 01024, Ukraine; goshovska@biph.kiev.ua (Y.V.G.); fedichkina@biph.kiev.ua (R.A.F.); vsagach@biph.kiev.ua (V.F.S.)

<sup>2</sup> Laboratory of Molecular Medical Biochemistry, Nencki Institute of Experimental Biology, Polish Academy of Sciences, 3 Pasteur Str., 02-093 Warsaw, Poland; v.balatskyi@nencki.edu.pl (V.V.B.); p.dobrzyn@nencki.edu.pl (P.D.)

<sup>3</sup> Department of Human Genetics, Institute of Molecular Biology and Genetics, National Academy of Sciences of Ukraine, 150 Akad. Zabolotnogo Str., Kyiv 03680, Ukraine; o.o.piven@imb.org.ua

\* Correspondence: goshovska@biph.kiev.ua; Tel.: +380-442562485; Fax: +380-442562000

**Abstract:** Glutathione (GSH) is essential for antioxidant defence, and its depletion is associated with tissue damage during cardiac ischemia-reperfusion (I/R). GSH is synthesized by the glutamate-cysteine ligase enzyme (GCL) from L-cysteine, which alternatively might be used for hydrogen sulfide production by cystathionine-gamma-lyase (CSE). Here, we have investigated whether in vivo treatment with L-cysteine and an inhibitor of CSE, D,L-propargylglycine (PAG), can modulate cardiac glutathione and whether this treatment can influence heart resistance to I/R in a Langendorff isolated rat hearts model. Pretreatment with PAG+L-cysteine manifested in pronounced cardioprotection, as there was complete recovery of contractile function; preserved constitutive NOS activity; and limited the production of reactive oxygen and nitrogen species in the ischemized myocardium. Cardiac GSH and GSSG levels were increased by 3.5- and 2.1-fold in PAG+L-cysteine hearts and were 3.3- and 3.6-fold higher in PAG+L-cysteine+I/R compared to I/R heart. The cardioprotective effect of PAG+L-cysteine was completely abolished by an inhibitor of GCL, DL-buthionine-(S,R)-sulfoximine. Further analysis indicated diminished fatty acid  $\beta$ -oxidation, increased glucose consumption and anaerobic glycolysis, and promoted OXPHOS proteins and SERCA2 in PAG+L-cysteine+I/R compared to the I/R group. PAG+L-cysteine inhibited PPAR $\alpha$  and up-regulated AMPK signalling in the heart. Thus, induction of glutathione synthesis provided cardioprotection regulating NO, AMPK and PPAR $\alpha$  signaling in ischemic rat hearts.

**Keywords:** cardioprotection; glutathione; ischemia; heart; SERCA; AMPK; PPAR $\alpha$

**Citation:** Goshovska, Y.V.; Fedichkina, R.A.; Balatskyi, V.V.; Piven, O.O.; Dobrzyn, P.; Sagach, V.F. Induction of Glutathione Synthesis Provides Cardioprotection Regulating NO, AMPK and PPAR $\alpha$  Signaling in Ischemic Rat Hearts. *Life* **2021**, *11*, 631. <https://doi.org/10.3390/life11070631>

Academic Editor: Friedrich Jung

Received: 17 May 2021

Accepted: 11 June 2021

Published: 29 June 2021

**Publisher's Note:** MDPI stays neutral with regard to jurisdictional claims in published maps and institutional affiliations.

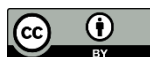

**Copyright:** © 2021 by the authors. Submitted for possible open access publication under the terms and conditions of the Creative Commons Attribution (CC BY) license (<http://creativecommons.org/licenses/by/4.0/>).

## Supplementary Materials:

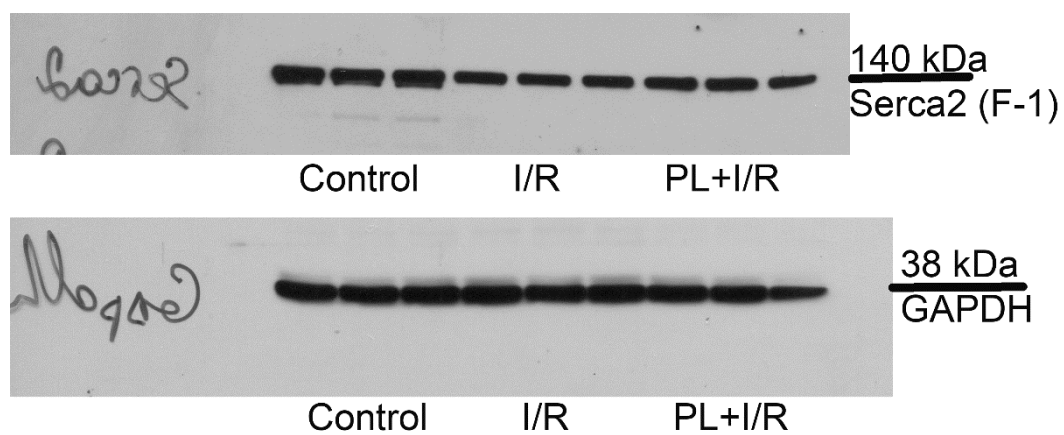**Figure S1.** Raw data of Western blots used on Figure 3a.

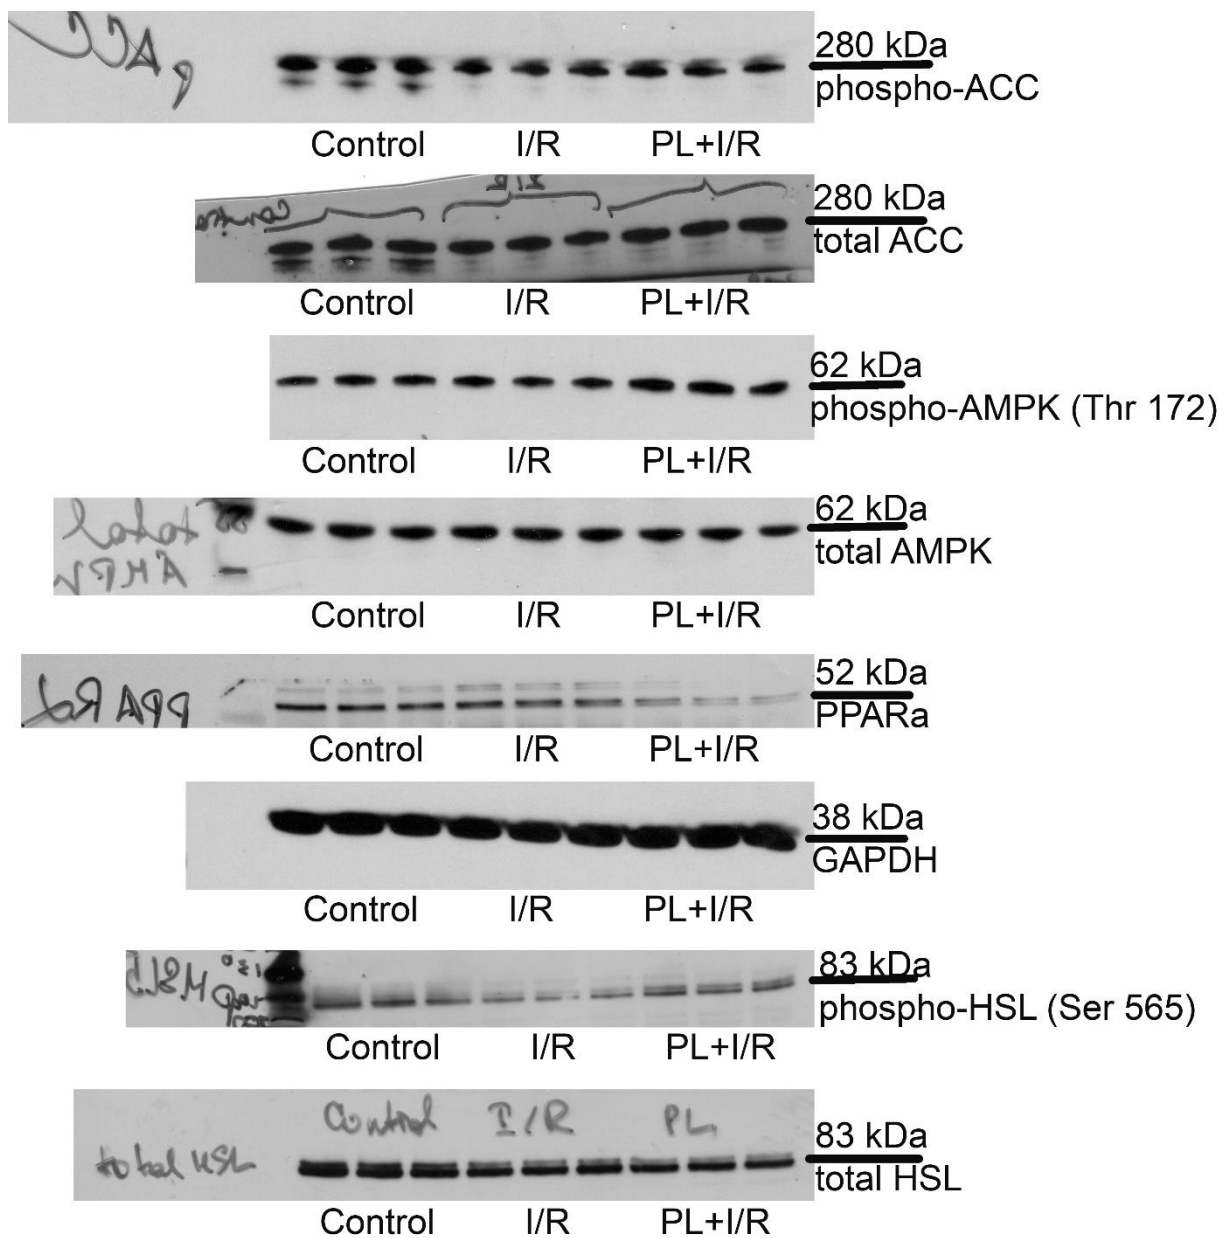

**Figure S2.** Raw data of Western blots used on Figure 5a.

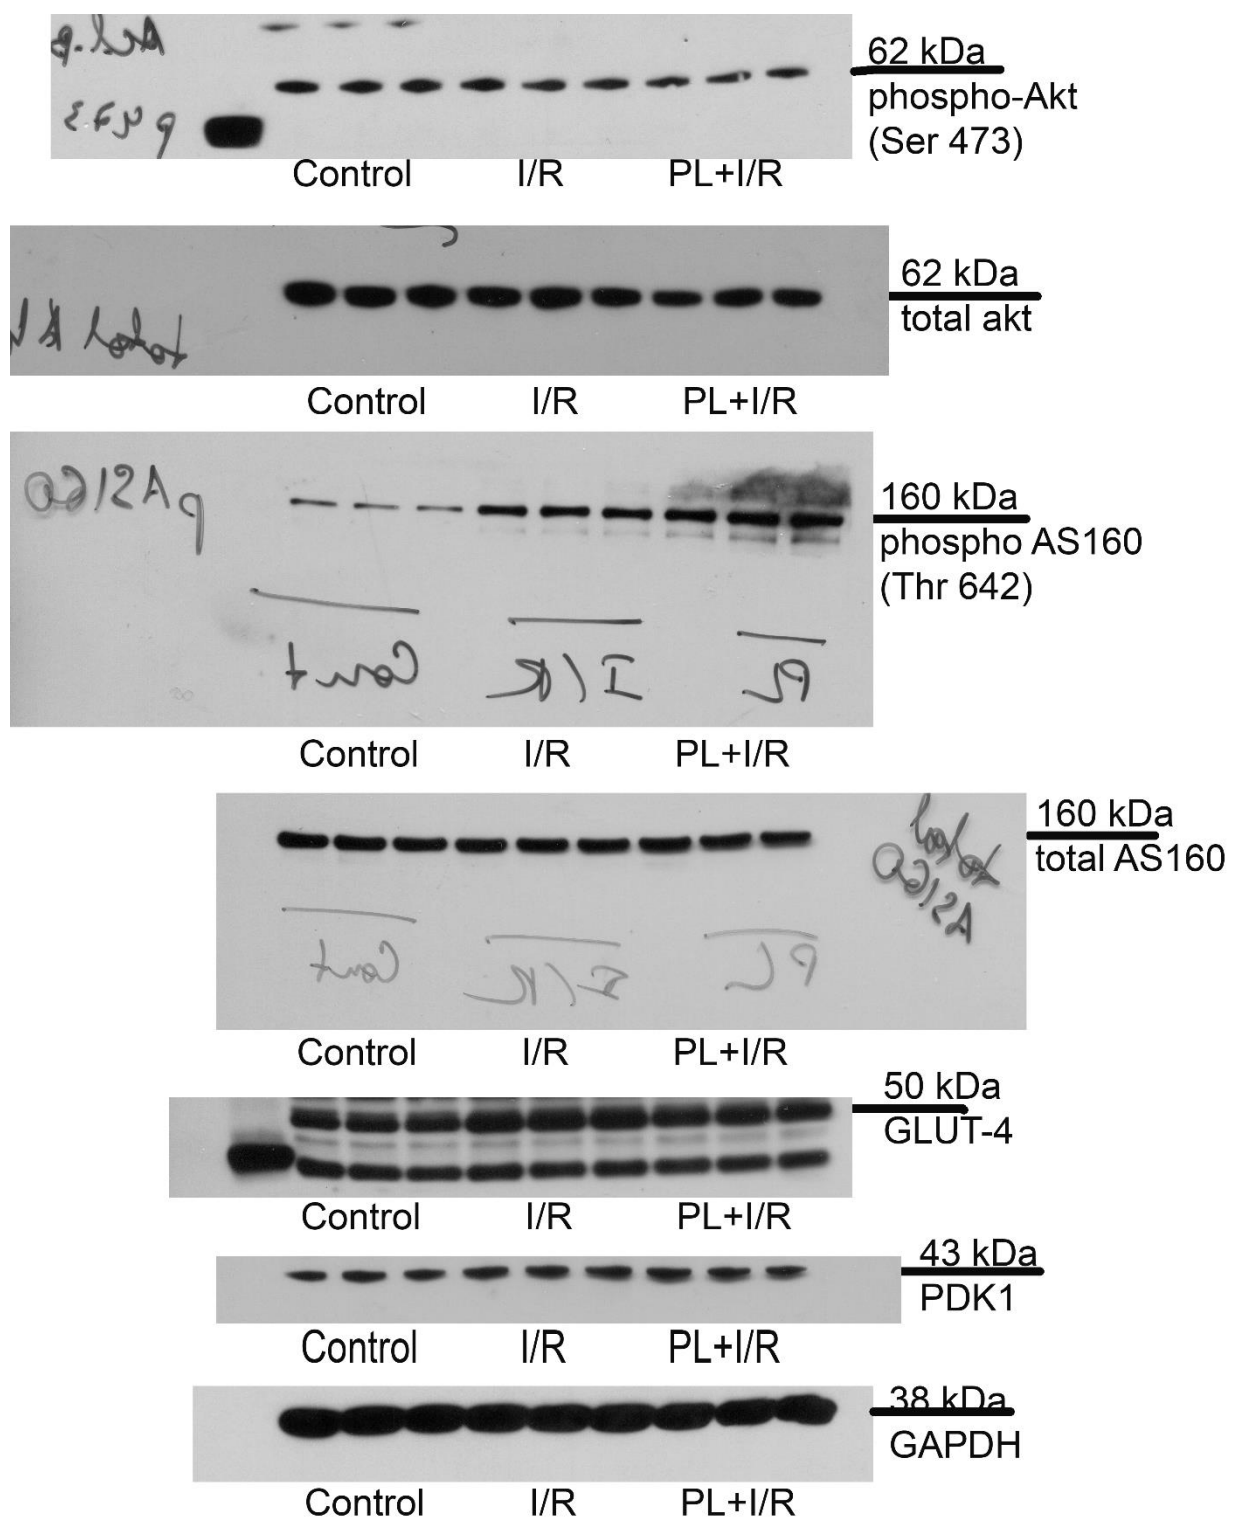

Figure S3. Raw data of Western blots used on Figure 6a.

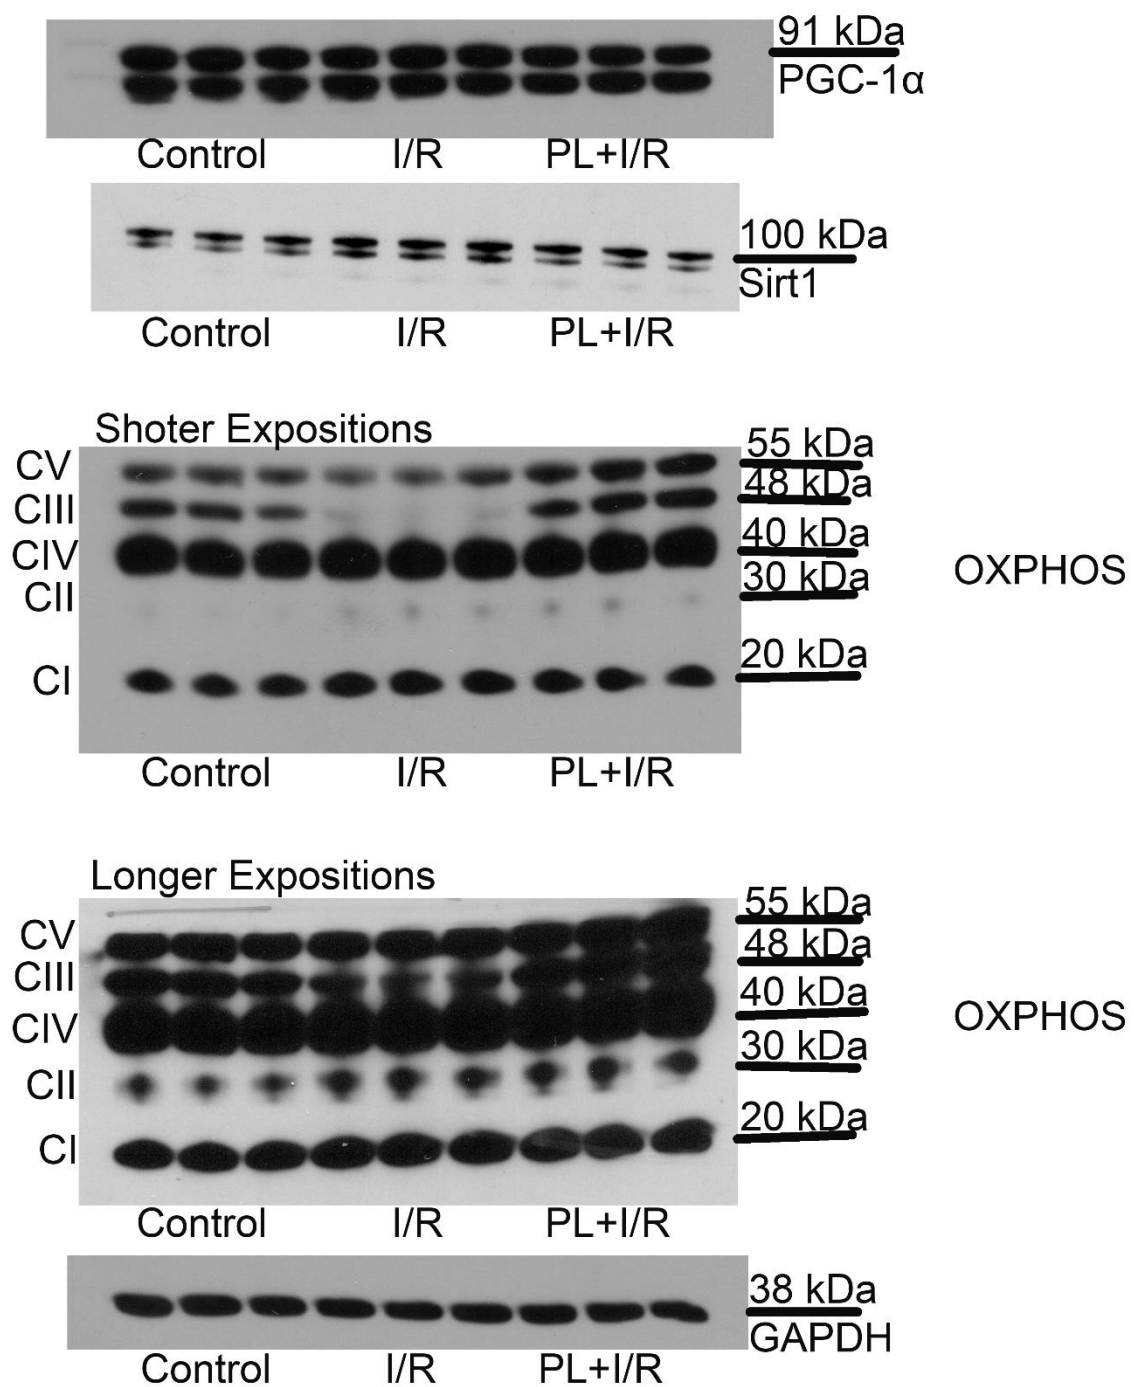

**Figure S4.** Raw data of Western blots used on Figure 7a.

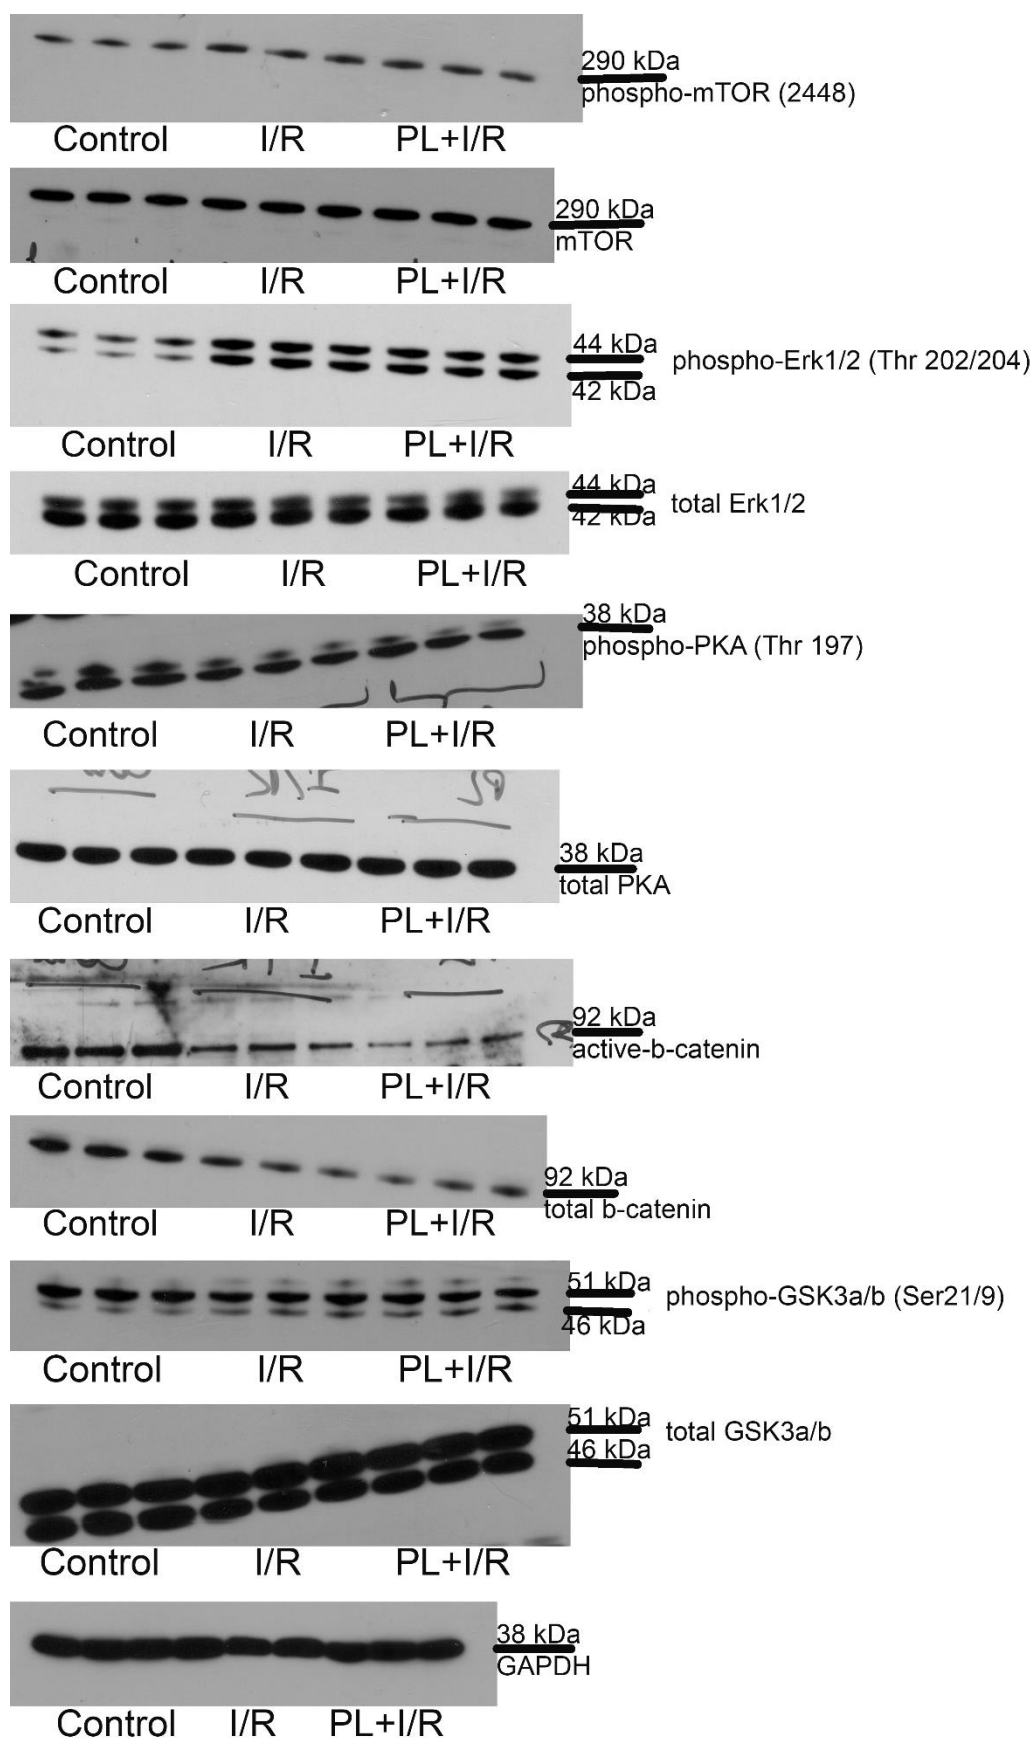

Figure S5. Raw data of Western blots used on Figure 8a.
